# Supplementary material for: PSBinder: A Web Service for Predicting Polystyrene Surface-Binding Peptides
Source: Biomed Res Int. 2017 Dec 27;2017:5761517. doi: 10.1155/2017/5761517 (PMC5763211; doi:10.1155/2017/5761517)
Supplement: Supplementary Materials — The supplementary dataset consists of the positive and negative datasets. Each dataset contains 104 peptides which were collected from the BDB database [16]. The “positive.txt” is the positive dataset; the “negative.txt” is the negative dataset. [file 5761517.f1.zip]

Archive with 2 entries (2 files):
- negative.txt
- positive.txt
