# Supplementary material for: PSBinder: A Web Service for Predicting Polystyrene Surface-Binding Peptides
Source: Biomed Res Int. 2017 Dec 27;2017:5761517. doi: 10.1155/2017/5761517 (PMC5763211; doi:10.1155/2017/5761517)
Supplement: Supplementary Materials — The supplementary dataset consists of the positive and negative datasets. Each dataset contains 104 peptides which were collected from the BDB database [16]. The “positive.txt” is the positive dataset; the “negative.txt” is the negative dataset. [file 5761517.f1.zip › negative.txt]

>1
DGFPGCRGDCSQE
>2
CCRERGCENMVCP
>3
GCWTDVSYWSFFC
>4
LGTPRKCTKTELC
>5
RCLSALTCKMALC
>6
HEARTVSTTYLML
>7
VNCGWMYYGPCTN
>8
NAKFSGCVGRGGH
>9
DCLVTYCPQVRCQ
>10
RCLTGTFAPWAFC
>11
GCGGTEGHIGRGC
>12
QHKTSITGHHLEP
>13
SRTQDECWWTLTK
>14
WSLFHRPLPPLPP
>15
PQPYDKNRGPTLN
>16
AEDLWGCIQLKSK
>17
TEFLWGFRTVFHG
>18
NHPFNALSFSSRG
>19
NHNYPPLSLLTF
>20
SHDWRLMLSHLQ
>21
QHDRLLMLSYLV
>22
HHILPPKALLFG
>23
SHTFPPSWLLVR
>24
YSVKPPLPYLPP
>25
SHKIHPFQTTPY
>26
HSPRYHSEPQFG
>27
HAPRYHTIYGWP
>28
AFDWTFVPSLIL
>29
SLDWSHVPLLVL
>30
GPFINKSLGSSP
>31
HHGGGQDYEGGGESLIFHEYVPG
>32
NKVRNVHDTVGGGNRLILSEYTI
>33
VTPGAMILVEGGVSPKGARCTDL
>34
EMEWMKALRQHISGELRRNYTEE
>35
QHQNRQQLGSNIAATLPGKRESV
>36
RFINPTSHCFGSLSLWRQLSY
>37
HGMASQYFTCFHDSEPSSPGMFGWDPTTPTLPHPQVDE
>38
IAHRVVAYNSLDSNPIWLPGEESSSVFGDYHPMFRAPV
>39
HVPVFTRYNYAKPNDTDWPGGFVDSLSAHPQGPIAGGR
>40
MTLGYDRASPAPNTSFSNPGLDFNPFTYHPQGPHQILQ
>41
AGRAARDDDCRGHACMIIPGVSLFNSDHPMGAHPSIRR
>42
DFSSFLTGTNAMAPFWPFPGSTYLLGHPMAPRDLQTSN
>43
SASWKFNSSFGYPTGGIEPGPNCHPQACPDVALKSLSP
>44
VSEMSSFSGCNTDHHPQGPGGRHDIMRSISESRGYGSL
>45
EMLTLPLTSIPIPWHPQGPGYLYHKPPRGTDFRMLSSK
>46
PYRFYHPYSHPRHPQGDVPGSSAEVFHTFPNTQGRNSR
>47
ADYGTIGESPCHPQVDICPGALHHEFNEFFVGMSPEPS
>48
PSALGRFTRGPL
>49
GPIFVNSDKGER
>50
LSLSLDLLTFRT
>51
PDIRHYFIQNRG
>52
GCRIVYRRPLHL
>53
RTAGFDIKLIDT
>54
RIQYQAISTVSL
>55
SMWAHSSRDDAV
>56
AKSSAKGKASGV
>57
RHTDGLRRIAAR
>58
RTRRQGGDVSRD
>59
RPRRSAARGSEG
>60
ADRTRGRIRGNC
>61
NTVWRLNSSCGM
>62
EKWGMHQECYRH
>63
TMEPRWWCNPIN
>64
VRTRDDARTHRK
>65
PASRVEKNGVRR
>66
KSLENSQ
>67
AWLSPAR
>68
LGRSPRY
>69
MLFNISE
>70
SSHSWRL
>71
TPITQLL
>72
NQDVPLF
>73
TTKKNVT
>74
PKPEQGR
>75
PLLSAWP
>76
RGGLMRGGSSDTRLMGWQSSSIYSFQARGS
>77
RAYQTTLLTL
>78
ATQVQHEAMH
>79
GKYFTAAPAS
>80
GIRWLAFPYG
>81
WARWLLLTPA
>82
IVRLLSEYHM
>83
GPAEPRGAWV
>84
DTHAGMHSPT
>85
ESVREQVMKY
>86
MGNKRSAKRP
>87
EVFRWSAASV
>88
GLGWCGVRWG
>89
PCNTKRTASC
>90
GMWWWPLFTL
>91
PQVWGVWTDE
>92
VLNWPGMLLV
>93
WHLACAGVFS
>94
WGRFWGRWLA
>95
WWDFLQGSER
>96
FAMWYPLGWR
>97
TWWWTWAGKH
>98
SGFDPLITHA
>99
SDWDPLFTHK
>100
MAEVLENSVG
>101
LSNTLQTTNKK
>102
EQYQLAWPAMQS
>103
DWVAVKQSYF
>104
HLVAVIGSYR
