# Supplementary material for: PSBinder: A Web Service for Predicting Polystyrene Surface-Binding Peptides
Source: Biomed Res Int. 2017 Dec 27;2017:5761517. doi: 10.1155/2017/5761517 (PMC5763211; doi:10.1155/2017/5761517)
Supplement: Supplementary Materials — The supplementary dataset consists of the positive and negative datasets. Each dataset contains 104 peptides which were collected from the BDB database [16]. The “positive.txt” is the positive dataset; the “negative.txt” is the negative dataset. [file 5761517.f1.zip › positive.txt]

>1
FRMDFDYLYPSLP
>2
LNFMIFYLSLNPW
>3
FSYSVSYAHPEGL
>4
SVAFYDYLPTDLP
>5
LSFSDFYFSEGSE
>6
FAPMKSYGVSLPP
>7
LFGPIEYTQFLAN
>8
LFDAYWYSDTAMS
>9
PASLELYENLVAG
>10
GENFCPYSFFGCG
>11
YLSLHAYESFGGS
>12
FFGFDVYDMSNAL
>13
FYMPFGPTWWQHV
>14
LPHLIQYRVLLVS
>15
GFAWSSYLGTTVH
>16
FLSFVFPASAWGG
>17
FFPSSWYSHLGVL
>18
FFSFFFPASAWGS
>19
FKFWLYEHVIRG
>20
YWFHNFPTKMYA
>21
FYRFVGDHKQLY
>22
YIWPLMGSHYAK
>23
WHYGVELWIRRF
>24
PWWWVSWVDAGGGSLALPTQPSD
>25
WGWPTWWGWTGGDARHPSAPEAH
>26
WWDPDIWFGWGGAHPPNLIQPIS
>27
GWQSGWEWWIGGGNWTSNTTH
>28
PYWMFYGFDWRGGFPPSHQIMDQ
>29
WMQSWYYHWGGGETFPIRRDSGG
>30
EIHGNLYNWSPLLGYSYFPGISPKHISGEVPPRPSTKV
>31
YTGWETWYSFDPFTHYGGPGSRFDFVHDKSEDPIDRSY
>32
QDLDHWSYWSMYSTYPTSPGLVPYSWGYGSPNSHTDKL
>33
IYYPFFVWGNYANGGLLSPGHVYSSNFIPLYMQREVSP
>34
SSRLAYDHYFPSWRSYIFPGSNSSYYNNSWPTITMETN
>35
RPYLYDPNEWHRYYSYLLPGHSYNVQSWPDGLGKSASR
>36
LGFSGWYWQGLYGLGSHDPGFIHEQSPAEVAMEDTEQS
>37
QTLIDFHDLHYWGAYYGWPGIYDEASGSQAVRHNMTHT
>38
DSWPLRIYSGLSNYYHYFPGSLVYNMMYPSLSRLPKGD
>39
HHGAMNRYYTWLWDNSRFPGRSYLLSAPATQPEASISQ
>40
TYDYTYDWSGLFWSPFTHPGAHMTTHSPWAGHKPHAET
>41
KGLRGWREMISL
>42
LDPGAMRTIVRP
>43
QLVEGVRHRIWN
>44
FHENWPS
>45
FHWTWYW
>46
APFYYSWFPSYMAEGLPSPSPLDPVQDNLY
>47
VDWVGWGASW
>48
WVEWRRGWLS
>49
SRTWVLWIRY
>50
WGYVFHGWNL
>51
MWGMHWAGEW
>52
CCWGYGGSLV
>53
PWNAWGRTWV
>54
VYRVIWFVGR
>55
GGWAMWGRVW
>56
FHAFHAWSAA
>57
RPVAGDHPGS
>58
GSVWWQAHVDR
>59
WRLGFARWIG
>60
WMRWGRSWGR
>61
GSWKEWGGAW
>62
LNWRGGWNWF
>63
SAWVRWGRVW
>64
FLPYARWFSR
>65
WSAWVGDWAL
>66
VIYYFLVMFM
>67
SRGFWLVWEQ
>68
VCFVMFSMCR
>69
GVIHWRAWGGDW
>70
LWGGLYGIWM
>71
TWTLWFASMS
>72
LSAWARWGSS
>73
GETRAPL
>74
FPGRPSP
>75
YLTMPTP
>76
FSWEAFA
>77
HLESTPG
>78
RHEPPLA
>79
GETQCAA
>80
HTAQSTA
>81
GRIQRWWVMFLL
>82
IISRAGVVRGNE
>83
ADYLSRWGSIRN
>84
ETYVFDNHFHAP
>85
TVSEVASTSNLD
>86
SRVHRAVLNGVS
>87
RPPGVVRRYALG
>88
VRSWEEQARVTT
>89
RAFIASRRIKRP
>90
VSQRVGFITSAP
>91
AGAGGGNVPVCS
>92
RESTLKGTSRAV
>93
AGLRLKKAAIHR
>94
SSLLRAVPEPTG
>95
EWDITTECTVTF
>96
WHRWPWLVSG
>97
WHWWYWALDR
>98
WHWNAPWWNGVY
>99
FHWTWQFPYTST
>100
GAMHLPWHMGTL
>101
HWNIWWQHHPSP
>102
HFFKWHTRTNDQ
>103
HFFRWHPSAHLG
>104
HFAYWWNGVRGP
